# Supplementary material for: Rituximab abrogates aquaporin-4–specific germinal center activity in patients with neuromyelitis optica spectrum disorders
Source: Proc Natl Acad Sci U S A. 2022 Jun 6;119(24):e2121804119. doi: 10.1073/pnas.2121804119 (PMC9214492; doi:10.1073/pnas.2121804119)
Supplement: Supplementary File [file pnas.2121804119.sapp.pdf]

- 1 **Supplementary information**
- 2
- 3 **Rituximab abrogates aquaporin-4-specific germinal centre activity in patients with**
- 4 **Neuromyelitis optica spectrum disorders**



16 were indistinguishable. **c.** Overarching gating strategy for the flow cytometry data analysis  
17 with red gates representing populations that were analysed within the study. Grey gates  
18 illustrate populations used to derive red gates. AQP4= aquaporin 4; dCLN= lymph node;  
19 FNA= fine needle aspiration; IgG = Immunoglobulin G; IgM= Immunoglobulin M; PBMC=  
20 peripheral blood mononuclear cells; RTX = Rituximab.

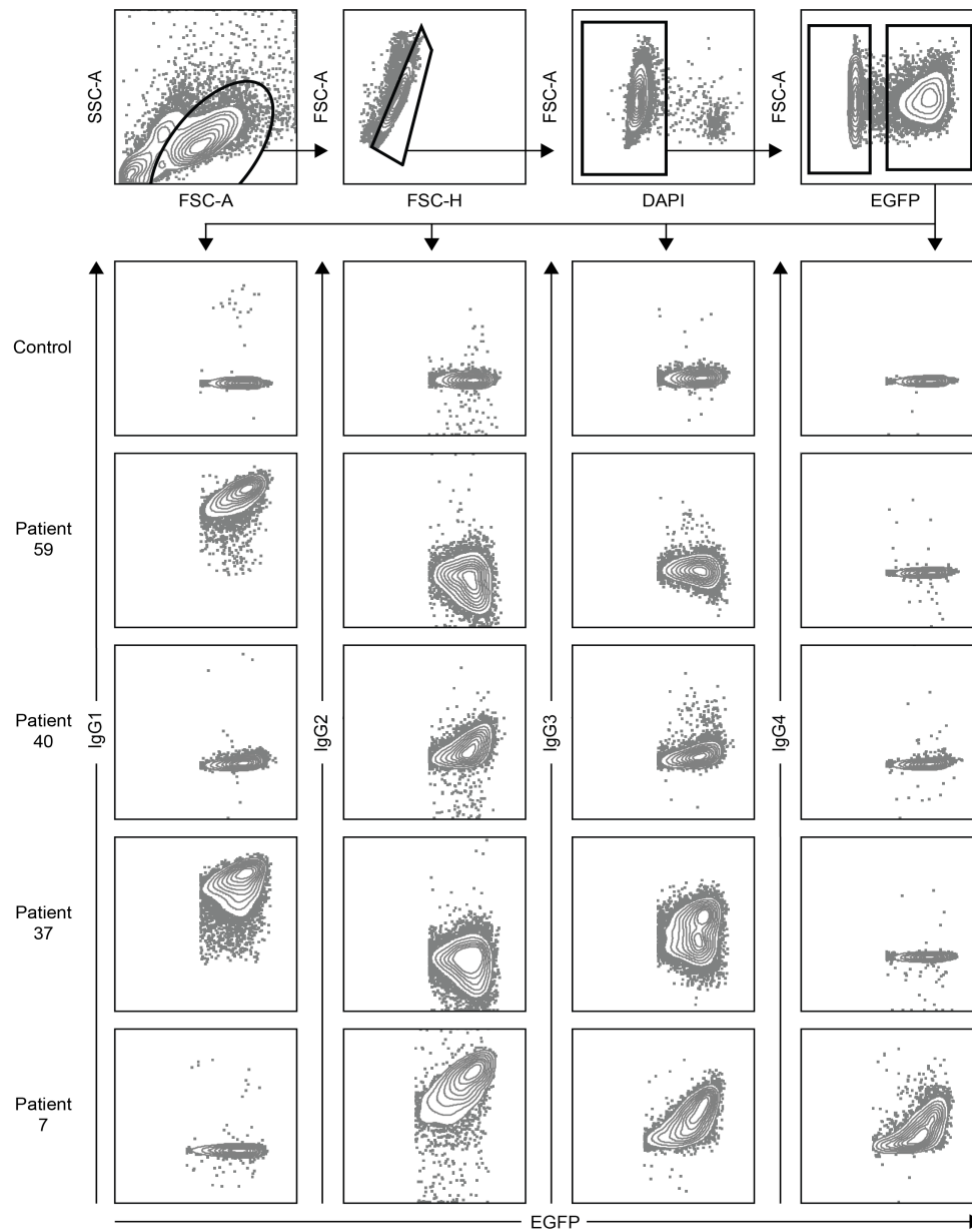

21

22 **Supplementary Figure 2. Detection of AQP4-IgG subclasses.** Flow cytometry gating and  
 23 representative examples of AQP4-IgG1-4 subclasses detection in four NMOSD patients.

24 AQP4= aquaporin 4; EGFP= enhanced green fluorescent protein; IgG = Immunoglobulin G;

25 NMOSD = Neuromyelitis Optica spectrum disorders.

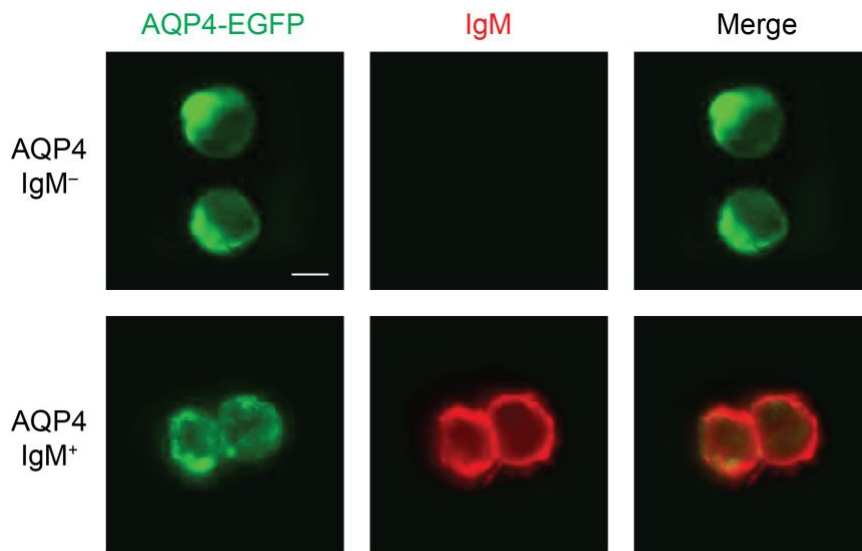

26

27 **Supplementary Figure 3. Detection of AQP4-IgM by live cell-based assay.** After  
 28 depletion of IgG, AQP4-IgM were detected in serum by binding (anti-human IgM, red) to the  
 29 surface of live AQP4- EGFP transfected HEK293T cells (green). AQP4= aquaporin 4;  
 30 EGFP= enhanced green fluorescent protein; HEK= Human embryonic kidney; IgM =  
 31 Immunoglobulin M.

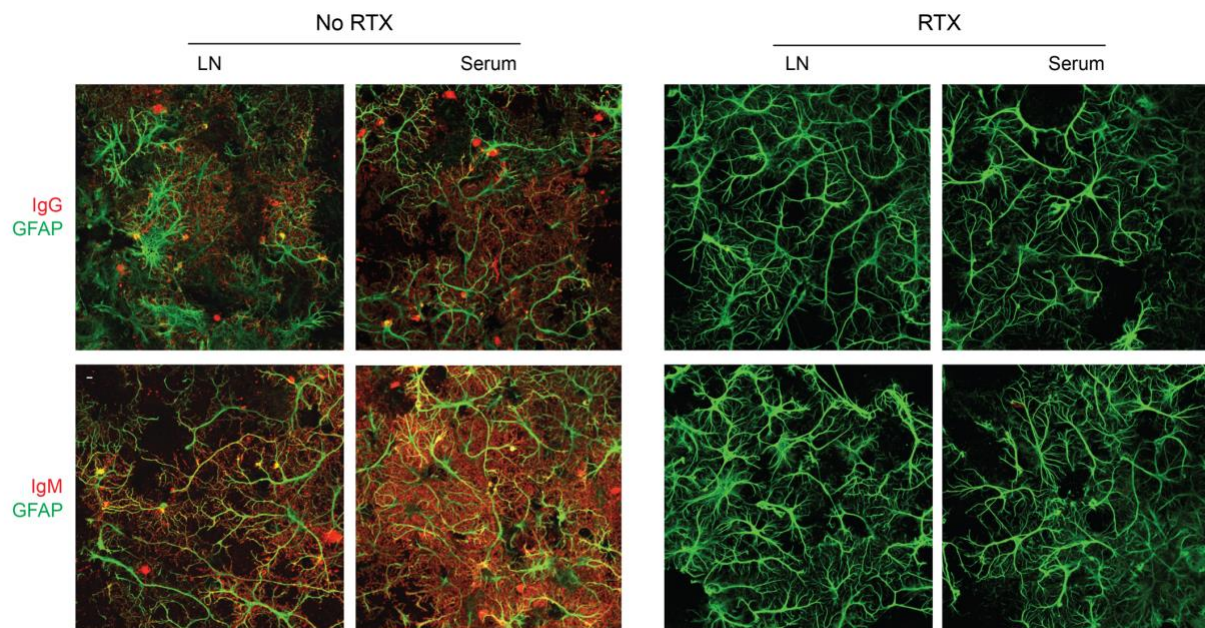

**Supplementary Figure 4. RTX administration is associated with absence of detectable AQP4-IgG/M in dCLN aspirates and matched sera.** Both matched sera and dCLN aspirates from seven RTX-naïve NMOSD patients contained detectable surface astrocyte binding (and AQP4-IgG, e.g. Figure 2D). In addition, 2/7 of these LN aspirates, but not the matched sera, contained AQP4-IgM (shown in Figure 2E). By contrast, astrocyte binding was only detected in 2/11 LN aspirates from patients administered RTX. A commercial antibody specific for GFAP confirmed their designation as astrocytes. Scale bar 10  $\mu$ m. AQP4= aquaporin 4; dCLN = deep cervical lymph node; GFAP= glial fibrillary acidic protein; IgG = Immunoglobulin G; IgM= Immunoglobulin M; LN= lymph node; NMOSD = Neuromyelitis Optica spectrum disorders; RTX = Rituximab.

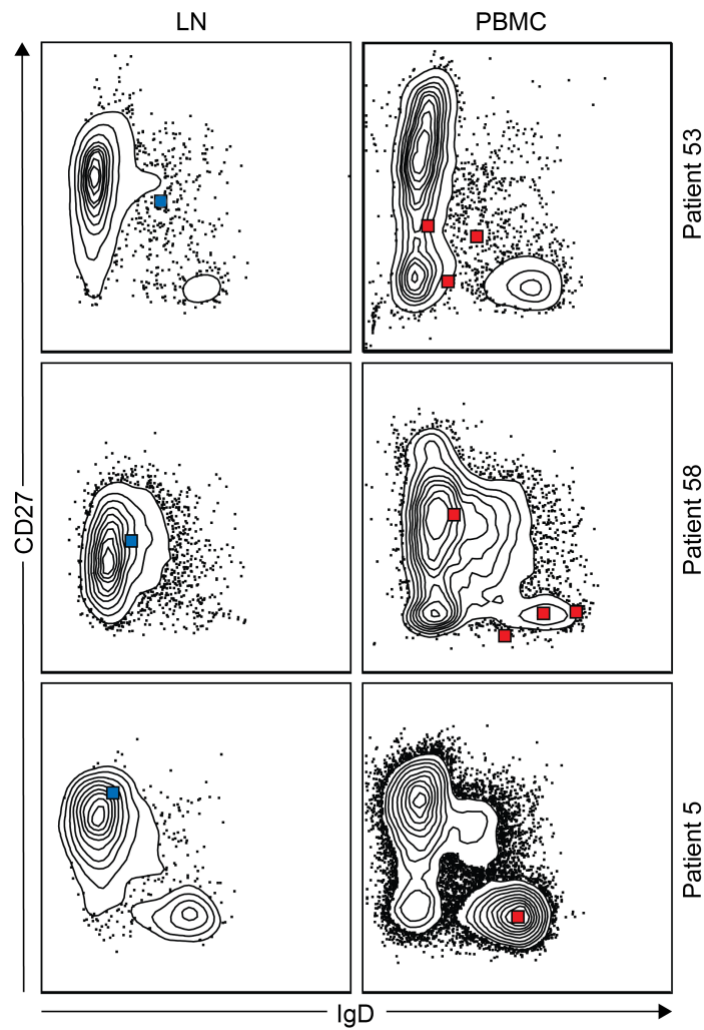

**Supplementary Figure 5. Phenotypes of AQP4-expressing B cells.** Red dots represent cells found in PBMC whereas blue dots represent cells found in dCLNs, across three patients after index sorting. AQP4= aquaporin 4; dCLN= lymph node; PBMC= peripheral blood mononuclear cells.

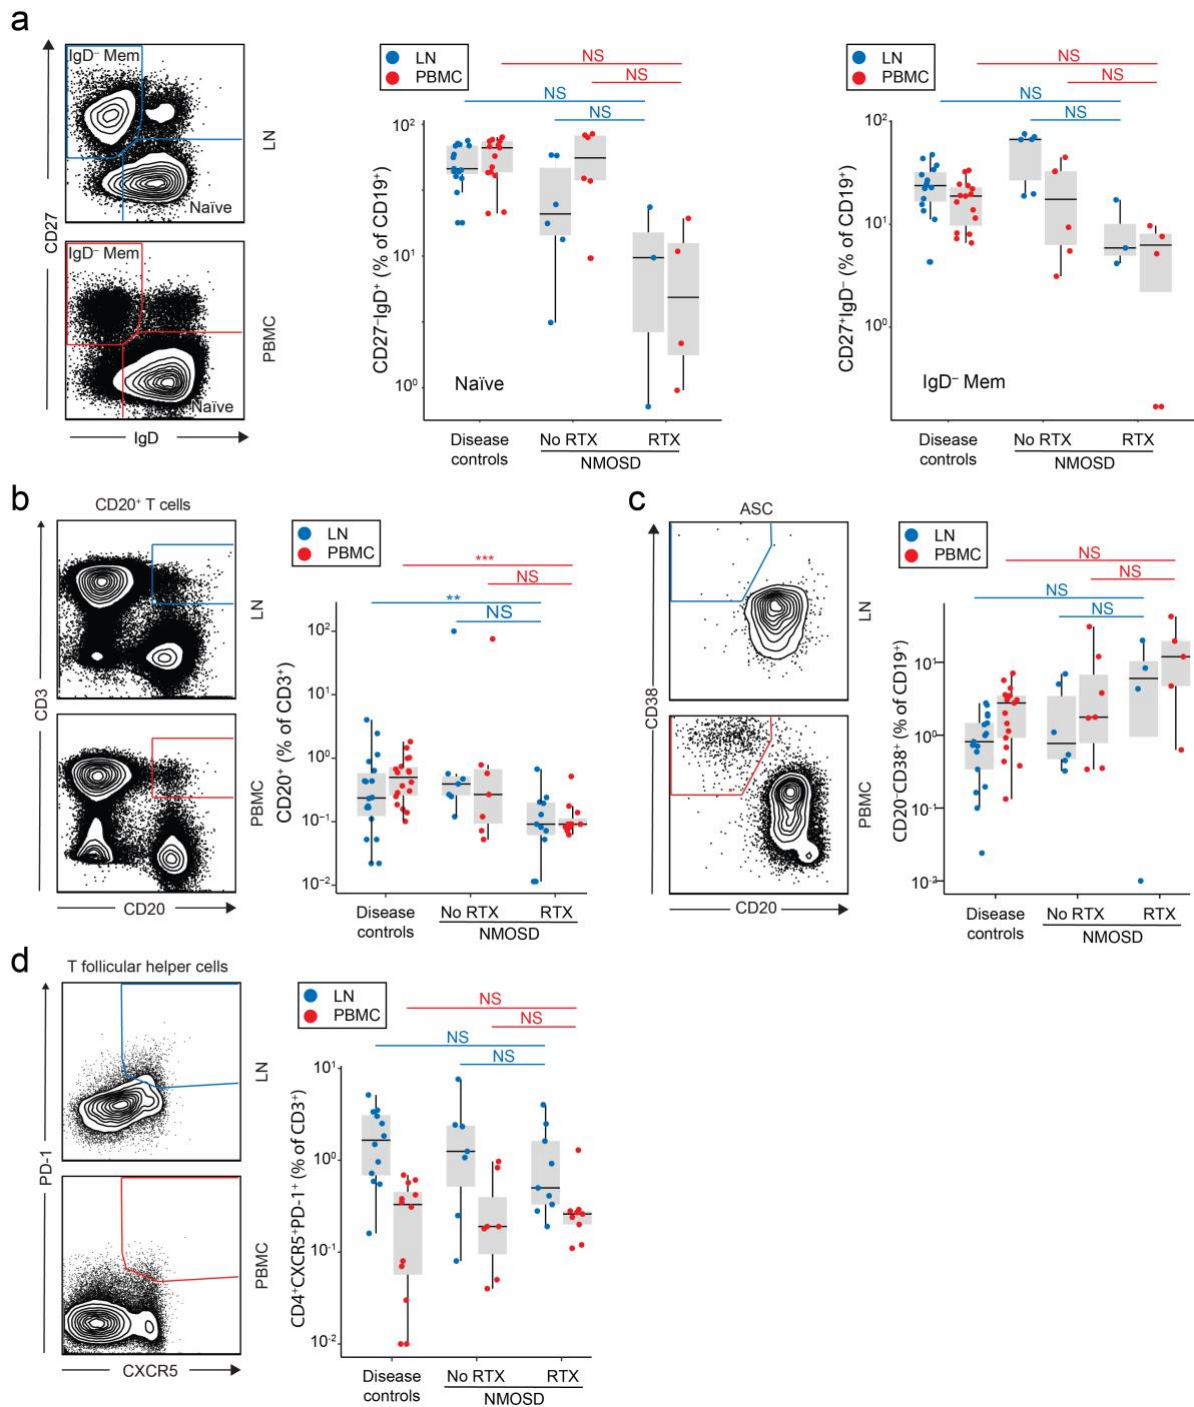

47

48 **Supplementary Figure 6. B- and T-cell subset frequencies in PBMC and dCLNs**

49 **compared across disease controls and NMOSD patients after or naïve to RTX. a.**

50 IgD<sup>+</sup>CD27<sup>-</sup> naïve and IgD<sup>-</sup>CD27<sup>+</sup> memory B cell subset frequency expressed as a percentage

51 of total CD19<sup>+</sup> B-cells. **b.** CD20<sup>+</sup>CD3<sup>+</sup> subset frequency (CD20<sup>+</sup> T cells) expressed as a

52 percentage of total CD3<sup>+</sup> cells. **c.** CD19<sup>+</sup>CD20<sup>-</sup>CD38<sup>+</sup> antibody-secreting cell (ASC) subset

53 frequency expressed as a percentage of total CD19<sup>+</sup> B-cells. **d.** CD4<sup>+</sup>CXCR5<sup>+</sup>PD-1<sup>++</sup> T  
54 follicular helper subset frequency expressed as a percentage of total CD3<sup>+</sup> cells. For all  
55 populations, only individuals with more than 50 cells in the parent population (i.e. CD19<sup>+</sup> or  
56 CD3<sup>+</sup>) were included. A median of 6704 B cells events (range 61-99629) was analysed.  
57 Statistical analyses with Mann-Whitney U-test after Benjamini-Hochberg correction for the  
58 20 overall comparisons. ASC = antibody-secreting cell; dCLN= lymph node; NMOSD =  
59 Neuromyelitis Optica spectrum disorders; PBMC= peripheral blood mononuclear cells; RTX  
60 = Rituximab; Tfh= T follicular helper cells. NS= not significant; \*\*p < 0.01; \*\*\*p < 0.001.

|                                  | RTX (N=35)  | No RTX (N=28) |          |
|----------------------------------|-------------|---------------|----------|
| Female proportion                | 30/35 (86%) | 25/28 (89%)   | p=0.48°  |
| Mean age at NMOSD onset          | 36          | 45            | p=0.007‡ |
| Mean disease duration (months)   | 132         | 128           | p=0.90‡  |
| Median ARR                       | 0.89†       | 0.28          | p<0.001° |
| Median number of immunotherapies | 2†          | 1             | p=0.10°  |
| Median AQP4-IgG titre            | 200†        | 800           | p=0.09°  |

61

62 **Supplementary Table 1. Clinical and demographic characteristics of the two NMOSD**

63 **cohorts included in the study.** Patients data were tested for normality (Gauss distribution

64 with the Anderson Darling, D'Agostino & Pearson, Shapiro-Wilk and Kolmogorov-Smirnov

65 tests). Normally distributed data were analysed with an unpaired t-test (‡); otherwise, a

66 Mann-Whitney U test (°) was employed. †Data prior to rituximab administration. AQP4=

67 aquaporin 4; ARR = annualised relapse rate; IgG = Immunoglobulin G; NMOSD =

68 Neuromyelitis Optica spectrum disorders; RTX = Rituximab.

| Cohort           | Disease (patient number) | Gender/Age at disease onset | Previous IT         | ARR Pre-RTX | ARR Post-RTX | IT at time of FNA | Disease duration at FNA (months) | Number of RTX infusions prior to FNA | Time from last RTX at FNA (months) | Lymph node level for FNA |
|------------------|--------------------------|-----------------------------|---------------------|-------------|--------------|-------------------|----------------------------------|--------------------------------------|------------------------------------|--------------------------|
| No RTX           | NMOSD (#37)              | F/36                        | AZA                 | 0           | NA           | AZA               | 48                               | NA                                   | NA                                 | Va                       |
|                  | NMOSD (#48)              | F/53                        | Pred, MMF           | 0           | NA           | Pred, AZA         | 24                               | NA                                   | NA                                 | Ia                       |
|                  | NMOSD (#53)              | M/55                        | Pred, CyP; AZA      | 0.2         | NA           | Pred, AZA         | 61                               | NA                                   | NA                                 | Ia                       |
|                  | NMOSD (#58)              | F/41                        | Pred, AZA           | 0.2         | NA           | AZA               | 90                               | NA                                   | NA                                 | I                        |
|                  | NMOSD (#61)              | F/50                        | Pred, MMF           | 0.14        | NA           | MMF               | 84                               | NA                                   | NA                                 | Vb                       |
| SINGLE RTX DOSE  | NMOSD (#5)               | F/49                        | AZA; MMF            | 0.33        | 0            | MMF               | 180                              | 0 and 1                              | 0 and 0.5                          | Ia                       |
|                  | NMOSD (#7)               | F/35                        | Pred, AZA; MMF      | 0.11        | 0            | Pred, MMF         | 117                              | 1                                    | 7                                  | Ib                       |
|                  | NMOSD (#8)               | F/36                        | Pred, AZA; MMF      | 0.9         | 0            | Pred              | 96                               | 1                                    | 5                                  | III                      |
|                  | NMOSD (#9)               | F/39                        | Pred, AZA           | 0.5         | 0            | Pred, AZA         | 24                               | 0 and 1                              | 0 and 2                            | Ia                       |
| >1 RTX DOSE      | NMOSD (#1)               | F/48                        | Pred, MMF           | 1.02        | 0.09         | RTX               | 59                               | 14                                   | 4                                  | Va                       |
|                  | NMOSD (#2)               | F/34                        | Pred, AZA           | 1.73        | 0            | RTX               | 21                               | 10                                   | 2 and 11                           | Va                       |
|                  | NMOSD (#3)               | M/46                        | Pred, AZA           | 0.89        | 0            | RTX               | 41                               | 12                                   | 13                                 | Ia                       |
|                  | NMOSD (#4)               | F/14                        | Pred, AZA, MMF      | 1.92        | 0            | RTX               | 38                               | 11                                   | 3 and 6                            | Va                       |
|                  | NMOSD (#6)               | F/29                        | Pred, CyP, AZA, MTX | 2.28        | 0.625        | RTX               | 42                               | 12                                   | 0.5                                | Ia                       |
| DISEASE CONTROLS | Migraine                 | M/29                        | None                | NA          | NA           | None              | 44                               | NA                                   | NA                                 | Va                       |
|                  | Migraine                 | F/31                        | None                | NA          | NA           | None              | 72                               | NA                                   | NA                                 | II                       |
|                  | Migraine                 | M/76                        | none                | NA          | NA           | None              | 320                              | NA                                   | NA                                 | Ia                       |
|                  | NMDAR-Ab-E               | F/31                        | Pred, AZA           | NA          | NA           | Pred              | 58                               | NA                                   | NA                                 | Ib                       |
|                  | NMDAR-Ab-E               | F/19                        | Pred                | NA          | NA           | Pred              | 4                                | NA                                   | NA                                 | Va                       |
|                  | NMDAR-Ab-E               | F/31                        | Pred                | NA          | NA           | None              | 8                                | NA                                   | NA                                 | Ia                       |
|                  | NMDAR-Ab-E               | F/29                        | Pred                | NA          | NA           | None              | 27                               | NA                                   | NA                                 | Ia                       |
|                  | NMDAR-Ab-E               | F/25                        | Pred                | NA          | NA           | None              | 21                               | NA                                   | NA                                 | Va                       |
|                  | NMDAR-Ab-E               | F/18                        | Pred                | NA          | NA           | None              | 35                               | NA                                   | NA                                 | Ia                       |
|                  | NMDAR-Ab-E               | F/21                        | AZA, MMF            | NA          | NA           | Pred              | 222                              | NA                                   | NA                                 | Ib                       |
|                  | LGI1-Ab-E                | M/55                        | None                | NA          | NA           | None              | 48                               | NA                                   | NA                                 | Ia                       |
|                  | LGI1-Ab-E                | F/71                        | none                | NA          | NA           | None              | 8                                | NA                                   | NA                                 | Va                       |
|                  | GAD-Ab-E                 | F/66                        | None                | NA          | NA           | None              | 12                               | NA                                   | NA                                 | Ib                       |
|                  | GlyR-Ab-E                | F/56                        | Pred                | NA          | NA           | Pred              | 36                               | NA                                   | NA                                 | Ib                       |

**Supplementary Table 2. Clinical characteristics of patients undergoing cervical lymph node fine needle aspirations (FNA).** FNAs were performed in nine NMOSD patients treated with RTX, and five NMOSD patients naïve to RTX (overall, sampled at a median of 59 months into their disease; range 21-180). Also, FNAs were performed in 14 patients with other autoimmune and non-autoimmune neurological conditions. FNA was performed before and after RTX in two patients (NMOSD#5, NMOSD#9) and at two time-points after RTX in two other patients (NMOSD#2, NMOSD#4). From these four patients, FNA were from the same lymph node. Overall, cervical lymph node anatomical levels I, II, III and V were sampled. ARR = annualised relapse rate; AZA = azathioprine; CyP = cyclophosphamide; FNA = fine needle aspiration; GAD-Ab-E = glutamic acid decarboxylase antibody encephalitis; GlyR-Ab-E = glycine receptor antibody encephalitis; IT = immunotherapies; LGI1-Ab-E = leucine rich glioma inactivated 1 antibody encephalitis; MMF = mycophenolate mofetil; MTX = mitoxantrone; NMDAR-Ab-E = N-methyl-D-aspartate receptor antibody encephalitis; NMOSD = Neuromyelitis Optica spectrum disorders; Pred = prednisone; RTX = Rituximab.

| Patient | Tissue | B cell subset        | Heavy chain |             |          |           | Light chain |             |          |           |
|---------|--------|----------------------|-------------|-------------|----------|-----------|-------------|-------------|----------|-----------|
|         |        |                      | Isotype     | V gene      | J gene   | Mutations | Type        | V gene      | J gene   | Mutations |
| 5       | PBMC   | Naïve                | IgM         | IGHV4-34*01 | IGHJ5*02 | 0         | Lambda      | IGLV3-16*01 | IGLJ1*01 | 0         |
| 58      | PBMC   | Naïve                | IgM         | N/A         | N/A      | N/A       | Kappa       | IGKV4-1*01  | IGKJ4*01 | 1         |
| 58      | PBMC   | Naïve                | IgM         | N/A         | N/A      | N/A       | Kappa       | IGKV3-11*01 | IGKJ4*01 | 0         |
| 58      | PBMC   | Naïve                | IgM         | N/A         | N/A      | N/A       | Kappa       | IGKV1-39*01 | IGKJ3*01 | 0         |
| 53      | PBMC   | DN                   | IgM         | IGHV3-30*18 | IGHJ4*02 | 0         | Kappa       | IGKV3-15*01 | IGKJ3*01 | 1         |
| 53      | PBMC   | IgD <sup>+</sup> mem | IgM         | IGHV3-33*01 | IGHJ4*02 | 5         | Lambda      | IGLV2-14*01 | IGLJ1*01 | 3         |
| 53      | dCLN   | IgD <sup>+</sup> mem | IgM         | N/A         | N/A      | N/A       | Lambda      | IGLV3-1*01  | IGLJ2*01 | 11        |
| 5       | dCLN   | IgD <sup>-</sup> mem | IgG         | IGHV4-34*01 | IGHJ6*03 | 17        | Lambda      | IGLV3-19*01 | IGLJ3*02 | 17        |
| 53      | PBMC   | IgD <sup>-</sup> mem | IgM         | IGHV3-48*02 | IGHJ2*01 | 14        | Kappa       | IGKV3-20*01 | IGKJ2*01 | 2         |
| 58      | PBMC   | IgD <sup>-</sup> mem | IgM         | IGHV3-30*18 | IGHJ4*02 | 14        | Kappa       | IGKV2-28*01 | IGKJ5*01 | 19        |
| 58      | dCLN   | IgD <sup>-</sup> mem | IgG         | IGHV3-30*04 | IGHJ6*02 | 10        | Kappa       | IGKV4-1*01  | IGKJ3*01 | 10        |

#### 84 **Supplementary Table 3. Characteristics of AQP4-specific B cell receptor sequences**

85 **retrieved from single B cell cultures.** The table shows the patient number, tissue from  
86 which the B cell subset (naïve [CD27<sup>+</sup>IgD<sup>+</sup>]; double negative [DN; CD27<sup>-</sup>IgD<sup>-</sup>]; IgD<sup>+</sup>  
87 memory [mem; CD27<sup>+</sup>IgD<sup>+</sup>]; IgD<sup>-</sup> memory [CD27<sup>+</sup>IgD<sup>-</sup>]) was isolated and characteristics of  
88 both the heavy chains (isotype detected in culture, predicted V and J gene alleles and total  
89 number of variable region mutations; www.imgt.com) and light chains (lambda or kappa;  
90 predicted V and J gene alleles and total number of variable region mutations;  
91 www.imgt.com). From four B cells, heavy chains were not amplified (N/A). AQP4 =  
92 aquaporin-4; dCLN = deep cervical lymph node; DN = double negative; IGH =  
93 immunoglobulin heavy chain; IGL = immunoglobulin light chain; IgG = Immunoglobulin G;  
94 IgM = Immunoglobulin M; K = kappa; L = lambda; PBMC = peripheral blood mononuclear  
95 cells.
